# Supplementary material for: Dimethyl sulfide (DMS) climatologies, fluxes, and trends – Part 2: Sea–air fluxes
Source: Copernicus journal article supplement (doi:10.5194/bg-21-4453-2024), 2024-10-14
Supplement: Supplementary file 1 [file bg-21-4453-2024-supplement.pdf]

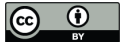

*Supplement of*

## **Dimethyl sulfide (DMS) climatologies, fluxes, and trends – Part 2: Sea–air fluxes**

**Sankirna D. Joge et al.**

*Correspondence to:* Anoop S. Mahajan (anoop@tropmet.res.in)

The copyright of individual parts of the supplement might differ from the article licence.

## Supplementary Tables :

**Table S1:** Monthly binned and averaged in situ Flux data at 1°×1° resolution.

| Month | Year | Latitude | Longitude | In Situ DMS Flux ( $\mu\text{mol m}^{-2} \text{d}^{-1}$ ) | References               |
|-------|------|----------|-----------|-----------------------------------------------------------|--------------------------|
| 9     | 1991 | 0        | 160       | 1.6                                                       | (Marandino et al., 2007) |
| 9     | 1991 | 5        | 126       | 0.8                                                       |                          |
| 9     | 1991 | 13       | 160       | 0.6                                                       | (Marandino et al., 2008) |
| 9     | 1991 | 17       | 130       | 3                                                         |                          |
| 9     | 1991 | 20       | 127       | 1                                                         | (Marandino et al., 2009) |
| 9     | 1991 | 27       | 136       | 2.2                                                       |                          |
| 9     | 1991 | 28       | 147       | 0.7                                                       | (Yang et al., 2011)      |
| 9     | 1991 | 29       | 147       | 2.4                                                       |                          |
| 10    | 1991 | 20       | -155      | 0.8                                                       | (Bell et al., 2015)      |
| 2     | 1994 | 16       | 146       | 1.4                                                       |                          |
| 2     | 1994 | 136      | 147       | 1.5                                                       | (Blomquist et al., 2017) |
| 3     | 1994 | 1        | 146       | 1.9                                                       |                          |
| 11    | 1995 | -54      | 159       | 0.4                                                       | (Omori et al., 2017)     |
| 11    | 1995 | -53      | 138       | 1.3                                                       |                          |
| 11    | 1995 | -48      | 137       | 0.6                                                       | (Smith et al., 2018)     |
| 11    | 1995 | -47      | 146       | 1.2                                                       |                          |
| 11    | 1995 | -44      | 151       | 2.6                                                       | (Shon et al., 2001)      |
| 11    | 1995 | -41      | 144       | 6.6                                                       |                          |
| 12    | 1995 | -51      | 157       | 3.5                                                       | (Leck and Persson, 1996) |
| 12    | 1995 | -50      | 148       | 2.8                                                       |                          |
| 12    | 1995 | -47      | 151       | 2.6                                                       | (Sharma et al., 1999)    |
| 12    | 1995 | -46      | 146       | 2.2                                                       |                          |
| 12    | 1995 | -46      | 149       | 2.2                                                       | (Land et al., 2014)      |
| 12    | 1995 | -45      | 144       | 2.75                                                      |                          |
| 12    | 1995 | -42      | 142       | 2.4                                                       |                          |
| 12    | 1995 | -41      | 139       | 0.9                                                       |                          |
| 6     | 2000 | 41       | -71       | 6.2                                                       |                          |
| 11    | 2003 | -8       | -109      | 11.4                                                      |                          |
| 11    | 2003 | -8       | -108      | 8.72                                                      |                          |
| 11    | 2003 | -8       | -107      | 9.08                                                      |                          |
| 11    | 2003 | -8       | -106      | 6.6                                                       |                          |
| 11    | 2003 | -8       | -105      | 7.85                                                      |                          |

|    |      |    |      |          |
|----|------|----|------|----------|
| 11 | 2003 | -8 | -104 | 6.54     |
| 11 | 2003 | -8 | -103 | 9        |
| 11 | 2003 | -8 | -102 | 8.08     |
| 11 | 2003 | -8 | -101 | 7.675    |
| 11 | 2003 | -8 | -100 | 6.1      |
| 11 | 2003 | -8 | -99  | 7.94     |
| 11 | 2003 | -8 | -98  | 8.125    |
| 11 | 2003 | -8 | -97  | 6.64     |
| 11 | 2003 | -8 | -96  | 7.275    |
| 11 | 2003 | -8 | -95  | 6.64     |
| 11 | 2003 | -7 | -95  | 8.5      |
| 11 | 2003 | -6 | -95  | 6.22     |
| 11 | 2003 | -5 | -95  | 4.2      |
| 11 | 2003 | -4 | -95  | 5.35     |
| 11 | 2003 | -3 | -110 | 5.5      |
| 11 | 2003 | -3 | -95  | 7.233333 |
| 11 | 2003 | -2 | -110 | 3.716667 |
| 11 | 2003 | -2 | -95  | 2.7625   |
| 11 | 2003 | -1 | -110 | 2.4      |
| 11 | 2003 | -1 | -95  | 1.1      |
| 11 | 2003 | 0  | -110 | 2.1      |
| 11 | 2003 | 0  | -100 | 7.1      |
| 11 | 2003 | 0  | -95  | 7.084615 |
| 11 | 2003 | 1  | -95  | 8.236364 |
| 11 | 2003 | 1  | -94  | 6.1      |
| 11 | 2003 | 1  | -93  | 4.25     |
| 11 | 2003 | 1  | -92  | 4.9      |
| 11 | 2003 | 2  | -110 | 9.5      |
| 11 | 2003 | 2  | -95  | 9.7625   |
| 11 | 2003 | 2  | -92  | 5.25     |
| 11 | 2003 | 2  | -91  | 6.975    |
| 11 | 2003 | 2  | -90  | 7.25     |
| 11 | 2003 | 3  | -110 | 12.5     |
| 11 | 2003 | 3  | -95  | 7.844444 |
| 11 | 2003 | 3  | -90  | 10.35    |
| 11 | 2003 | 3  | -89  | 13.925   |
| 11 | 2003 | 3  | -88  | 15.6     |

|    |      |    |      |          |
|----|------|----|------|----------|
| 11 | 2003 | 4  | -110 | 16.64    |
| 11 | 2003 | 4  | -95  | 6.3875   |
| 11 | 2003 | 4  | -88  | 16.65    |
| 11 | 2003 | 4  | -87  | 9.72     |
| 11 | 2003 | 4  | -86  | 7.35     |
| 11 | 2003 | 5  | -110 | 5.68     |
| 11 | 2003 | 5  | -95  | 3.52     |
| 11 | 2003 | 7  | -95  | 4.566667 |
| 11 | 2003 | 8  | -110 | 2.25     |
| 11 | 2003 | 8  | -109 | 2.95     |
| 11 | 2003 | 8  | -107 | 4.2      |
| 11 | 2003 | 8  | -106 | 1.7      |
| 11 | 2003 | 8  | -96  | 3.9      |
| 11 | 2003 | 8  | -95  | 2.15     |
| 5  | 2004 | 5  | 168  | 1.105333 |
| 5  | 2004 | 5  | 169  | 1.66     |
| 5  | 2004 | 6  | 165  | 3.913333 |
| 5  | 2004 | 6  | 166  | 9.78     |
| 5  | 2004 | 7  | 161  | 3.083333 |
| 5  | 2004 | 7  | 162  | 3.925    |
| 5  | 2004 | 7  | 163  | 4.835    |
| 5  | 2004 | 8  | 159  | 2.4425   |
| 5  | 2004 | 8  | 160  | 2.4425   |
| 5  | 2004 | 9  | 155  | 3.36     |
| 5  | 2004 | 9  | 156  | 3.432857 |
| 5  | 2004 | 9  | 157  | 2.06     |
| 5  | 2004 | 10 | 155  | 4.705    |
| 5  | 2004 | 12 | 147  | 2.535    |
| 5  | 2004 | 12 | 148  | 1.43     |
| 6  | 2004 | 0  | -166 | 9.3      |
| 6  | 2004 | 0  | -165 | 8.403333 |
| 6  | 2004 | 1  | -167 | 8.67     |
| 6  | 2004 | 1  | -165 | 6.3325   |
| 6  | 2004 | 1  | -164 | 10.33    |
| 6  | 2004 | 2  | -164 | 8.845    |
| 6  | 2004 | 2  | -163 | 10.495   |
| 6  | 2004 | 4  | -162 | 8.215    |

|   |      |    |      |          |
|---|------|----|------|----------|
| 6 | 2004 | 4  | -161 | 6.26     |
| 6 | 2004 | 4  | -156 | 3.64     |
| 6 | 2004 | 5  | -160 | 8.005    |
| 6 | 2004 | 6  | -160 | 10.6     |
| 6 | 2004 | 7  | -157 | 6.67     |
| 6 | 2004 | 8  | -158 | 5.31     |
| 6 | 2004 | 21 | -156 | 6.05     |
| 6 | 2004 | 22 | -157 | 3.85     |
| 6 | 2004 | 23 | -155 | 2.89     |
| 6 | 2004 | 25 | -154 | 4.605    |
| 6 | 2004 | 26 | -155 | 4.675    |
| 6 | 2004 | 28 | -154 | 2.92     |
| 6 | 2004 | 45 | -144 | 2.19     |
| 7 | 2004 | 29 | -75  | 1.7      |
| 7 | 2004 | 29 | -74  | 4.42     |
| 7 | 2004 | 29 | -73  | 5.1      |
| 7 | 2004 | 29 | -64  | 7.236    |
| 7 | 2004 | 29 | -63  | 6.022222 |
| 7 | 2004 | 30 | -73  | 5.433333 |
| 7 | 2004 | 30 | -72  | 4.48     |
| 7 | 2004 | 30 | -71  | 5.8      |
| 7 | 2004 | 30 | -70  | 6.95     |
| 7 | 2004 | 30 | -66  | 6.4      |
| 7 | 2004 | 30 | -65  | 6.465517 |
| 7 | 2004 | 30 | -64  | 6.2      |
| 7 | 2004 | 31 | -69  | 5.5      |
| 7 | 2004 | 31 | -66  | 7.030303 |
| 7 | 2004 | 31 | -65  | 5.696429 |
| 8 | 2004 | 28 | -71  | 7.775    |
| 8 | 2004 | 28 | -70  | 6.3      |
| 8 | 2004 | 28 | -69  | 9.5      |
| 8 | 2004 | 29 | -69  | 7.35     |
| 8 | 2004 | 29 | -68  | 17.05    |
| 8 | 2004 | 29 | -67  | 4.45     |
| 8 | 2004 | 29 | -66  | 5.85     |
| 8 | 2004 | 29 | -65  | 4.5      |
| 8 | 2004 | 29 | -64  | 2.8      |

|   |      |     |      |          |
|---|------|-----|------|----------|
| 8 | 2004 | 30  | -60  | 6.2      |
| 1 | 2006 | -35 | -103 | 5.8      |
| 1 | 2006 | -34 | -103 | 6.505    |
| 1 | 2006 | -33 | -103 | 4.35     |
| 1 | 2006 | -28 | -103 | 1.48     |
| 1 | 2006 | -27 | -103 | 1.135    |
| 1 | 2006 | -26 | -103 | 1.17     |
| 1 | 2006 | -24 | -103 | 3.165    |
| 1 | 2006 | -23 | -103 | 2.46     |
| 1 | 2006 | -19 | -105 | 8.08     |
| 1 | 2006 | -18 | -105 | 5.48     |
| 1 | 2006 | -16 | -106 | 43.4     |
| 1 | 2006 | -15 | -107 | 36.15    |
| 1 | 2006 | -12 | -108 | 37.55    |
| 1 | 2006 | -11 | -109 | 15.1     |
| 1 | 2006 | -11 | -108 | 19.4     |
| 1 | 2006 | -10 | -109 | 7.52     |
| 1 | 2006 | -9  | -110 | 6.48     |
| 1 | 2006 | -7  | -110 | 5.88     |
| 1 | 2006 | -6  | -110 | 12.3     |
| 1 | 2006 | -4  | -110 | 11.4     |
| 1 | 2006 | -3  | -110 | 7.925    |
| 1 | 2006 | -2  | -110 | 7.385    |
| 1 | 2006 | -1  | -110 | 8.82     |
| 6 | 2007 | 43  | -18  | 4.516364 |
| 6 | 2007 | 44  | -18  | 3.2      |
| 7 | 2007 | 42  | -18  | 1.657576 |
| 7 | 2007 | 42  | -17  | 1.738462 |
| 7 | 2007 | 42  | -16  | 1.314286 |
| 7 | 2007 | 43  | -65  | 9.643333 |
| 7 | 2007 | 43  | -64  | 3.18     |
| 7 | 2007 | 43  | -18  | 2.565    |
| 7 | 2007 | 43  | -17  | 1        |
| 7 | 2007 | 43  | -16  | 2.356452 |
| 7 | 2007 | 44  | -63  | 0.475    |
| 7 | 2007 | 44  | -62  | 2.29     |
| 7 | 2007 | 44  | -61  | 2.855    |

|   |      |    |     |          |
|---|------|----|-----|----------|
| 7 | 2007 | 44 | -60 | 3.345    |
| 7 | 2007 | 44 | -59 | 0.555    |
| 7 | 2007 | 44 | -18 | 3.35     |
| 7 | 2007 | 44 | -16 | 3.6      |
| 7 | 2007 | 44 | -15 | 1.6      |
| 7 | 2007 | 45 | -59 | 3.42925  |
| 7 | 2007 | 45 | -58 | 5.342    |
| 7 | 2007 | 45 | -57 | 0.698    |
| 7 | 2007 | 45 | -56 | 0.785333 |
| 7 | 2007 | 45 | -20 | 5.2      |
| 7 | 2007 | 46 | -56 | 1.0135   |
| 7 | 2007 | 46 | -55 | 2.39     |
| 7 | 2007 | 46 | -54 | 4.677143 |
| 7 | 2007 | 46 | -53 | 2.85     |
| 7 | 2007 | 47 | -52 | 1.77     |
| 7 | 2007 | 47 | -51 | 2.32     |
| 7 | 2007 | 47 | -15 | 0.2      |
| 7 | 2007 | 48 | -51 | 2.756667 |
| 7 | 2007 | 48 | -50 | 4.53     |
| 7 | 2007 | 48 | -49 | 3.62     |
| 7 | 2007 | 49 | -49 | 7.515833 |
| 7 | 2007 | 49 | -48 | 11.24333 |
| 7 | 2007 | 50 | -48 | 13.4     |
| 7 | 2007 | 50 | -47 | 16.16    |
| 7 | 2007 | 50 | -46 | 9.953333 |
| 7 | 2007 | 51 | -46 | 12.38333 |
| 7 | 2007 | 51 | -45 | 7.863333 |
| 7 | 2007 | 51 | -44 | 4.11     |
| 7 | 2007 | 52 | -44 | 2.56     |
| 7 | 2007 | 52 | -43 | 4.972857 |
| 7 | 2007 | 52 | -42 | 5.46     |
| 7 | 2007 | 52 | -15 | 15.1     |
| 7 | 2007 | 53 | -42 | 5.613333 |
| 7 | 2007 | 53 | -41 | 17.77    |
| 7 | 2007 | 53 | -40 | 9.71     |
| 7 | 2007 | 53 | -15 | 19.86667 |
| 7 | 2007 | 53 | -14 | 33.4     |

|    |      |     |     |          |
|----|------|-----|-----|----------|
| 7  | 2007 | 54  | -14 | 19.2     |
| 7  | 2007 | 54  | -13 | 19.88571 |
| 7  | 2007 | 54  | -12 | 8.866667 |
| 7  | 2007 | 55  | -12 | 18.4     |
| 7  | 2007 | 55  | -11 | 16.05    |
| 7  | 2007 | 55  | -10 | 10.36667 |
| 7  | 2007 | 55  | -9  | 6.5      |
| 3  | 2008 | -54 | -37 | 1.484615 |
| 3  | 2008 | -53 | -37 | 0.7      |
| 3  | 2008 | -52 | -38 | 2.35     |
| 3  | 2008 | -52 | -37 | 2.15     |
| 3  | 2008 | -51 | -39 | 2.630435 |
| 3  | 2008 | -51 | -38 | 4.568376 |
| 3  | 2008 | -51 | -37 | 2.811864 |
| 3  | 2008 | -51 | -36 | 0.6      |
| 3  | 2008 | -50 | -39 | 5.26     |
| 3  | 2008 | -50 | -38 | 3.65     |
| 3  | 2008 | -50 | -37 | 2.933333 |
| 4  | 2008 | -52 | -37 | 1.7      |
| 4  | 2008 | -51 | -38 | 0.7      |
| 4  | 2008 | -51 | -37 | 1.326667 |
| 4  | 2008 | -50 | -40 | 2.9      |
| 4  | 2008 | -46 | -46 | 1.2      |
| 4  | 2008 | -45 | -47 | 1.55     |
| 4  | 2008 | -45 | -46 | 2.175    |
| 10 | 2008 | -20 | -86 | 2.873684 |
| 10 | 2008 | -20 | -85 | 4.696154 |
| 10 | 2008 | -20 | -84 | 7.38     |
| 10 | 2008 | -20 | -83 | 8.42     |
| 10 | 2008 | -20 | -82 | 7.86     |
| 10 | 2008 | -20 | -81 | 8.86     |
| 10 | 2008 | -20 | -80 | 10.08    |
| 10 | 2008 | -20 | -79 | 5.116667 |
| 10 | 2008 | -20 | -78 | 4.32     |
| 10 | 2008 | -20 | -77 | 3.9      |
| 10 | 2008 | -20 | -76 | 5.64     |
| 10 | 2008 | -20 | -75 | 3.805    |



|    |      |     |     |          |
|----|------|-----|-----|----------|
| 10 | 2008 | -19 | -86 | 8.3      |
| 10 | 2008 | -19 | -85 | 6.175    |
| 10 | 2008 | -18 | -85 | 4.16     |
| 10 | 2008 | -17 | -85 | 4.383333 |
| 10 | 2008 | -16 | -85 | 4.98     |
| 10 | 2008 | -15 | -85 | 2.76     |
| 10 | 2008 | -14 | -85 | 1.92     |
| 10 | 2008 | -13 | -85 | 3.5      |
| 10 | 2008 | -12 | -85 | 5.52     |
| 10 | 2008 | -11 | -85 | 5.366667 |
| 10 | 2008 | -10 | -85 | 6.4      |
| 10 | 2008 | -9  | -85 | 2.9      |
| 10 | 2008 | -8  | -85 | 0.883333 |
| 10 | 2008 | -7  | -85 | 2.9      |
| 10 | 2008 | -7  | -84 | 1.8      |
| 10 | 2008 | -6  | -84 | 2.828571 |
| 10 | 2008 | -5  | -84 | 1.84     |
| 10 | 2008 | -4  | -84 | 1.3      |
| 10 | 2008 | -4  | -83 | 1.725    |
| 10 | 2008 | -3  | -83 | 16.56    |
| 10 | 2008 | -2  | -83 | 14       |
| 10 | 2008 | -1  | -83 | 3.3      |
| 11 | 2008 | -22 | -80 | 3.4      |
| 11 | 2008 | -22 | -74 | 1.92     |
| 11 | 2008 | -22 | -72 | 2.9625   |
| 11 | 2008 | -22 | -71 | 0.45     |
| 11 | 2008 | -22 | -70 | 0.6      |
| 11 | 2008 | -21 | -85 | 2.43913  |
| 11 | 2008 | -21 | -84 | 2.844444 |
| 11 | 2008 | -21 | -83 | 3.441667 |
| 11 | 2008 | -21 | -82 | 3.364286 |
| 11 | 2008 | -21 | -81 | 1.933333 |
| 11 | 2008 | -21 | -80 | 2.263636 |
| 11 | 2008 | -21 | -79 | 5.1      |
| 11 | 2008 | -21 | -75 | 3.675    |
| 11 | 2008 | -21 | -74 | 1.8      |
| 11 | 2008 | -20 | -85 | 2.016667 |

|    |      |     |      |          |
|----|------|-----|------|----------|
| 11 | 2008 | -20 | -84  | 3.495455 |
| 11 | 2008 | -20 | -78  | 5.38     |
| 11 | 2008 | -20 | -77  | 2.62     |
| 11 | 2008 | -20 | -76  | 1.91875  |
| 11 | 2008 | -20 | -75  | 2.773913 |
| 11 | 2008 | -20 | -73  | 2        |
| 11 | 2008 | -20 | -72  | 1.718182 |
| 11 | 2008 | -19 | -84  | 2.155556 |
| 11 | 2008 | -19 | -81  | 1.2      |
| 11 | 2008 | -19 | -80  | 6.1      |
| 11 | 2008 | -19 | -79  | 2.633333 |
| 11 | 2008 | -19 | -76  | 4.1      |
| 11 | 2008 | -19 | -75  | 3.175    |
| 11 | 2008 | -19 | -74  | 0.8      |
| 11 | 2008 | -19 | -73  | 1.02     |
| 11 | 2008 | -19 | -72  | 1.56     |
| 11 | 2008 | -19 | -71  | 1.715385 |
| 12 | 2008 | -21 | -71  | 1.5      |
| 12 | 2008 | -21 | -70  | 0.9      |
| 1  | 2012 | -30 | -107 | 5.2      |
| 1  | 2012 | -23 | -120 | 12.1     |
| 1  | 2012 | -23 | -100 | 6.6      |
| 1  | 2012 | -20 | -100 | 26.1     |
| 2  | 2012 | -46 | 173  | 8.749756 |
| 2  | 2012 | -46 | 174  | 9.959917 |
| 2  | 2012 | -45 | 174  | 9.940588 |
| 2  | 2012 | -45 | 175  | 19.82411 |
| 2  | 2012 | -44 | 174  | 19.03833 |
| 2  | 2012 | -44 | 175  | 26.07352 |
| 2  | 2012 | -44 | 176  | 14.77714 |
| 2  | 2012 | -44 | 177  | 21.17849 |
| 2  | 2012 | -44 | 178  | 7.062713 |
| 2  | 2012 | -44 | 179  | 5.921477 |
| 2  | 2012 | -44 | 180  | 9.729116 |
| 2  | 2012 | -44 | 181  | 3.49889  |
| 2  | 2012 | -43 | 175  | 4.986496 |
| 2  | 2012 | -43 | 179  | 5.614133 |

|    |      |     |      |          |
|----|------|-----|------|----------|
| 2  | 2012 | -43 | 180  | 9.145043 |
| 3  | 2012 | -45 | 175  | 6.297276 |
| 3  | 2012 | -44 | -180 | 7.5      |
| 3  | 2012 | -44 | 173  | 9.406773 |
| 3  | 2012 | -44 | 174  | 11.11755 |
| 3  | 2012 | -44 | 175  | 17.04101 |
| 9  | 2012 | 43  | -133 | 14.8     |
| 9  | 2012 | 47  | -180 | 9.8      |
| 9  | 2012 | 47  | 170  | 7.4      |
| 10 | 2013 | 53  | -49  | 0.258138 |
| 10 | 2013 | 53  | -48  | 0.140438 |
| 10 | 2013 | 53  | -47  | 0.116901 |
| 10 | 2013 | 53  | -46  | 0.274299 |
| 10 | 2013 | 53  | -45  | 0.42615  |
| 10 | 2013 | 53  | -44  | 0.330985 |
| 10 | 2013 | 53  | -43  | 0.186145 |
| 10 | 2013 | 54  | -47  | 0.328994 |
| 10 | 2013 | 54  | -46  | 0.435587 |
| 10 | 2013 | 54  | -45  | 0.529874 |
| 10 | 2013 | 54  | -44  | 0.272545 |
| 10 | 2013 | 55  | -46  | 0.259339 |
| 10 | 2013 | 56  | -46  | 0.152437 |
| 10 | 2013 | 57  | -46  | 0.109785 |
| 10 | 2013 | 58  | -46  | 0.292686 |
| 10 | 2013 | 58  | -45  | 0.734069 |
| 10 | 2013 | 59  | -50  | 0.372846 |
| 10 | 2013 | 59  | -45  | 0.369968 |
| 10 | 2013 | 60  | -51  | 0.148186 |
| 10 | 2013 | 61  | -51  | 0.143013 |
| 10 | 2013 | 62  | -52  | 0.116265 |
| 10 | 2013 | 62  | -51  | 0.173884 |
| 10 | 2013 | 63  | -52  | 0.116019 |
| 11 | 2013 | 41  | -65  | 0.790641 |
| 11 | 2013 | 41  | -64  | 0.859507 |
| 11 | 2013 | 41  | -63  | 0.672312 |
| 11 | 2013 | 42  | -64  | 0.778588 |
| 11 | 2013 | 42  | -63  | 0.136175 |

|    |      |    |      |          |
|----|------|----|------|----------|
| 11 | 2013 | 43 | -63  | 0.208599 |
| 11 | 2013 | 43 | -62  | 0.119829 |
| 11 | 2013 | 44 | -62  | 0.131688 |
| 11 | 2013 | 44 | -61  | 0.168166 |
| 11 | 2013 | 45 | -61  | 0.12096  |
| 11 | 2013 | 45 | -60  | 0.238417 |
| 11 | 2013 | 46 | -60  | 0.239039 |
| 11 | 2013 | 46 | -59  | 0.20804  |
| 11 | 2013 | 47 | -60  | 0.440808 |
| 11 | 2013 | 47 | -59  | 0.184634 |
| 11 | 2013 | 48 | -60  | 0.305009 |
| 11 | 2013 | 49 | -60  | 0.237817 |
| 11 | 2013 | 49 | -59  | 0.334803 |
| 11 | 2013 | 50 | -58  | 0.289316 |
| 11 | 2013 | 51 | -57  | 0.3235   |
| 11 | 2013 | 52 | -57  | 0.191453 |
| 11 | 2013 | 52 | -56  | 0.188311 |
| 11 | 2013 | 52 | -55  | 0.2374   |
| 11 | 2013 | 52 | -54  | 0.346499 |
| 11 | 2013 | 52 | -53  | 0.411235 |
| 11 | 2013 | 52 | -52  | 0.371889 |
| 11 | 2013 | 52 | -51  | 0.374102 |
| 11 | 2013 | 52 | -50  | 0.391167 |
| 11 | 2013 | 52 | -49  | 0.357335 |
| 11 | 2013 | 52 | -48  | 0.229348 |
| 11 | 2013 | 52 | -47  | 0.294404 |
| 11 | 2013 | 53 | -47  | 0.316976 |
| 11 | 2013 | 53 | -46  | 0.258824 |
| 1  | 2014 | 33 | -175 | 11.1     |

- 10 **Table S2.** : Seasonal maximum positive and negative differences of DMS flux values in  $\mu\text{mol m}^{-2} \text{d}^{-1}$  at different ocean regions. There are some rows where both maximum positive or negative differences are not shown. This is due to N00b shows higher flux values than respective parametrization methods and hence those differences are not present.

| Parameterization | Season | Maximum Difference in $\mu\text{mol m}^{-2} \text{d}^{-1}$ | Ocean Region                       |
|------------------|--------|------------------------------------------------------------|------------------------------------|
| N00b - LM86      | DJF    | 8.10                                                       | Weddell Sea                        |
|                  | MAM    | 5.15                                                       | Caribbean Sea                      |
|                  | JJA    | 14.29                                                      | Indian Ocean                       |
|                  | SON    | 6.11                                                       | Indian Ocean                       |
| N00b - E93       | DJF    | -38.93 / 8.18                                              | Weddell Sea / Caribbean Sea        |
|                  | MAM    | -14.48 / 6.32                                              | Gulf of Finland / Caribbean Sea    |
|                  | JJA    | -11.32 / 18.45                                             | Gulf of Alaska / Indian Ocean      |
|                  | SON    | -10.61 / 6.81                                              | Weddell Sea / Indian Ocean         |
| N00b - N00a      | DJF    | 3.40                                                       | South Pacific Ocean                |
|                  | MAM    | 2.47                                                       | Caribbean Sea                      |
|                  | JJA    | 6.12                                                       | Indian Ocean                       |
|                  | SON    | 2.98                                                       | Indian Ocean                       |
| N00b - Ho06      | DJF    | -10.59 / 1.86                                              | Ross Sea / Indian Ocean            |
|                  | MAM    | -4.32 / 1.50                                               | North Sea / Caribbean Sea          |
|                  | JJA    | -3.92 / 2.37                                               | North Atlantic Ocean / Arabian Sea |
|                  | SON    | -5.67 / 1.81                                               | Southern Ocean / Bay of Bengal     |
| N00b - GM12      | DJF    | 5.93                                                       | Caribbean Sea                      |
|                  | MAM    | 4.37                                                       | Caribbean Sea                      |
|                  | JJA    | 16.17                                                      | Caribbean Sea                      |
|                  | SON    | 4.94                                                       | Indian Ocean                       |
| N00b - W14       | DJF    | 4.12                                                       | Ross Sea                           |
|                  | MAM    | 2.59                                                       | North Sea                          |
|                  | JJA    | 4.52                                                       | Caribbean Sea                      |
|                  | SON    | 2.93                                                       | Indian Ocean                       |

**Table S3.** : Monthly and annual maximum values of  $\sigma_{DMS}$ ,  $\sigma_k$ ,  $\sigma_{wind}$  and  $\sigma_{total}$  in  $\mu\text{mol m}^{-2} \text{d}^{-1}$  at the different oceanic regions.

| <b>Month</b>     | <b>Max. <math>\sigma_{DMS}</math> at<br/>Ocean Region<br/>(<math>\mu\text{mol m}^{-2} \text{d}^{-1}</math>)</b> | <b>Max. <math>\sigma_k</math> at<br/>Ocean Region<br/>(<math>\mu\text{mol m}^{-2} \text{d}^{-1}</math>)</b> | <b>Max. <math>\sigma_{wind}</math> at<br/>Ocean Region<br/>(<math>\mu\text{mol m}^{-2} \text{d}^{-1}</math>)</b> | <b>Max. <math>\sigma_{total}</math> at<br/>Ocean Region<br/>(<math>\mu\text{mol m}^{-2} \text{d}^{-1}</math>)</b> |
|------------------|-----------------------------------------------------------------------------------------------------------------|-------------------------------------------------------------------------------------------------------------|------------------------------------------------------------------------------------------------------------------|-------------------------------------------------------------------------------------------------------------------|
| <b>January</b>   | 34.64<br>South Atlantic Ocean                                                                                   | 21.70<br>Weddell Sea                                                                                        | 6.64<br>Southern Ocean                                                                                           | 22.66<br>Weddell Sea                                                                                              |
| <b>February</b>  | 23.41<br>South Atlantic Ocean                                                                                   | 6.99<br>Weddell Sea                                                                                         | 4.58<br>Southern Ocean                                                                                           | 16.20<br>South Atlantic Ocean                                                                                     |
| <b>March</b>     | 15.58<br>North Atlantic Ocean                                                                                   | 3.17<br>South Atlantic Ocean                                                                                | 1.90<br>Southern Ocean                                                                                           | 12.68<br>South Pacific Ocean                                                                                      |
| <b>April</b>     | 16.54<br>North Atlantic Ocean                                                                                   | 6.67<br>Guld of Finland                                                                                     | 1.54<br>Alboran Sea                                                                                              | 13.29<br>North Atlantic Ocean                                                                                     |
| <b>May</b>       | 20.55<br>Arabian Sea                                                                                            | 9.12<br>Sea of Okhotsk                                                                                      | 2.74<br>Gulf of Alaska                                                                                           | 17.17<br>North Atlantic Ocean                                                                                     |
| <b>June</b>      | 21.68<br>North Atlantic Ocean                                                                                   | 7.49<br>Indian Ocean                                                                                        | 2.82<br>South Pacific Ocean                                                                                      | 19.18<br>North Atlantic Ocean                                                                                     |
| <b>July</b>      | 23.87<br>Arabian Sea                                                                                            | 8.86<br>Indian Ocean                                                                                        | 3.12<br>Gulf of Aden                                                                                             | 24.60<br>Arabian Sea                                                                                              |
| <b>August</b>    | 21.86<br>Arabian Sea                                                                                            | 5.75<br>Indian Ocean                                                                                        | 2.12<br>Caribbean Sea                                                                                            | 21.97<br>Arabian Sea                                                                                              |
| <b>September</b> | 13.38<br>Arafura Sea                                                                                            | 6.12<br>Indian Ocean                                                                                        | 2.51<br>Indian Ocean                                                                                             | 13.39<br>Arafura Sea                                                                                              |
| <b>October</b>   | 12.10<br>Indian Ocean                                                                                           | 2.93<br>Bay of Bengal                                                                                       | 2.86<br>Philippine Sea                                                                                           | 9.05<br>Argentine Sea                                                                                             |
| <b>November</b>  | 18.40<br>South Atlantic Ocean                                                                                   | 10.43<br>Weddell Sea                                                                                        | 6.13<br>Southern Sea                                                                                             | 16.47<br>South Atlantic Ocean                                                                                     |
| <b>December</b>  | 28.76<br>South Atlantic Ocean                                                                                   | 17.00<br>Weddell Sea                                                                                        | 6.98<br>Southern Ocean                                                                                           | 18.91<br>South Atlantic Ocean                                                                                     |
| <b>Annual</b>    | <b>11.42</b><br><b>South Atlantic Ocean</b>                                                                     | <b>5.35</b><br><b>Weddell Sea</b>                                                                           | <b>2.62</b><br><b>Southern Ocean</b>                                                                             | <b>8.55</b><br><b>North Atlantic Ocean</b>                                                                        |

Supplementary Figures :

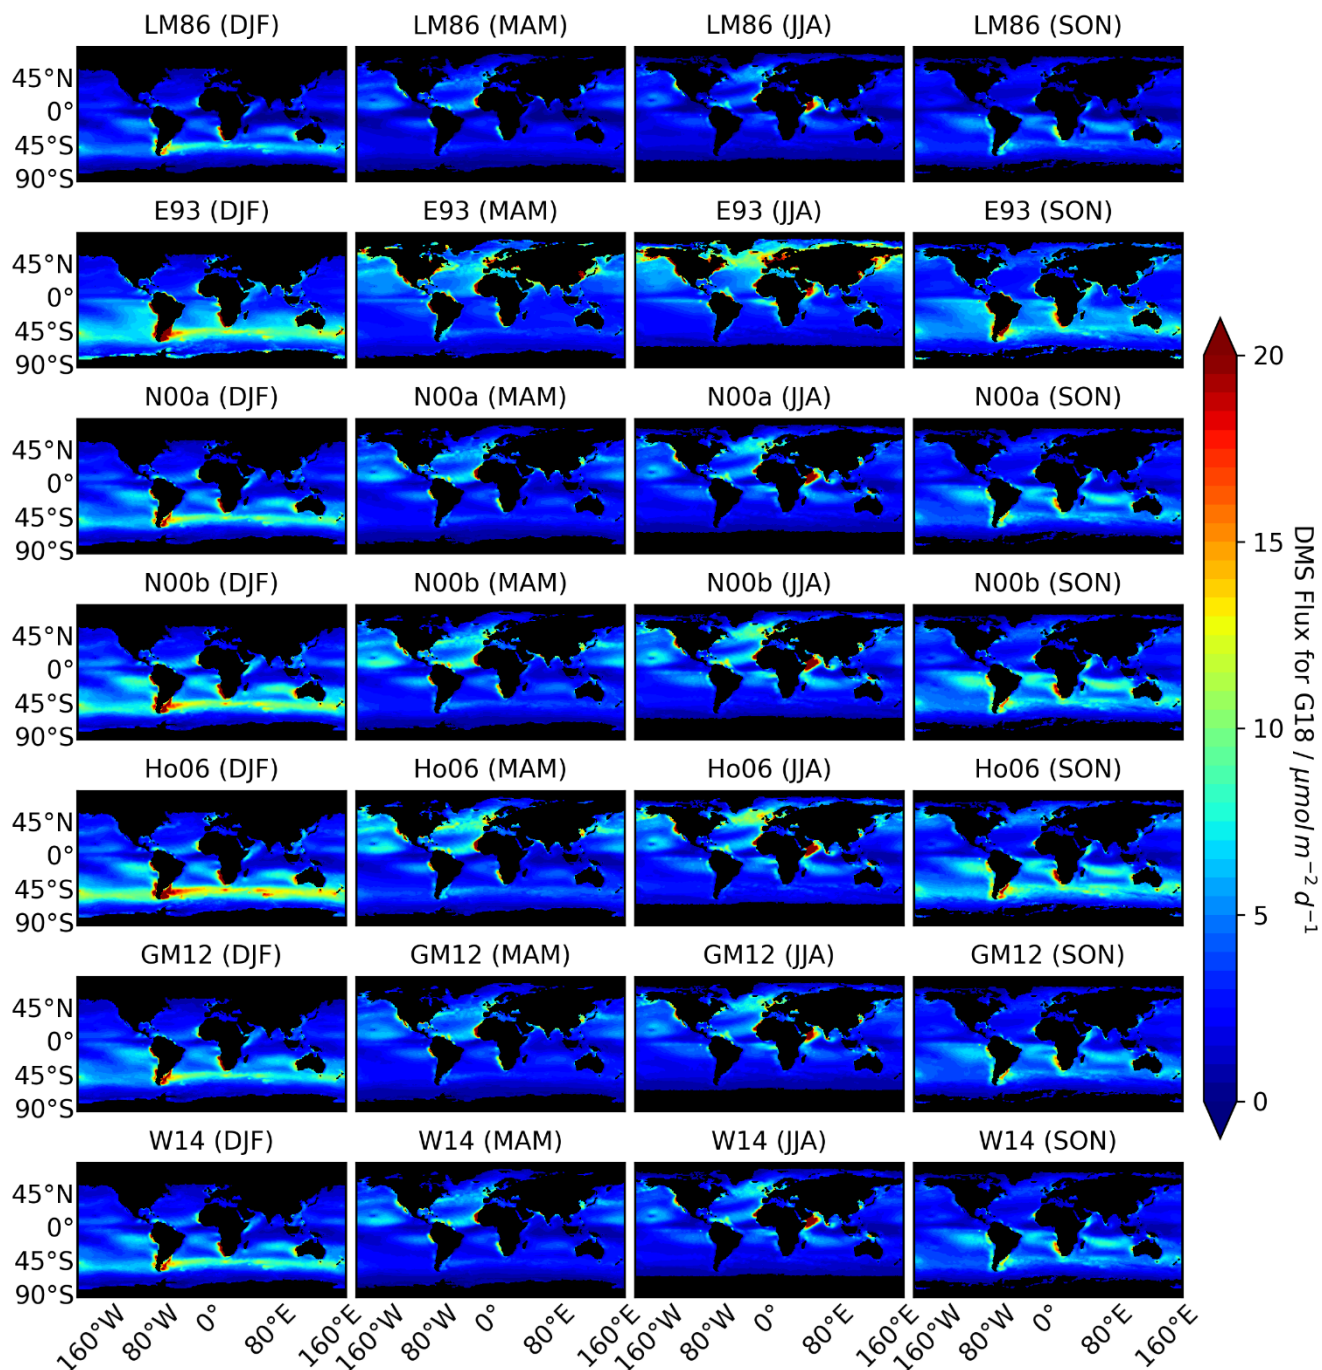

25

**Figure S1:** DMS flux estimation using seven different parameterizations for different seasons using the G18 climatology. In the June-July-August (JJA) season, the maximum flux of  $44.75 \mu\text{mol m}^{-2} \text{d}^{-1}$  is calculated in Arabian with N00b. In December-January-February (DJF) season, the highest value of  $49.34 \mu\text{mol m}^{-2} \text{d}^{-1}$  in the South Atlantic Ocean with Ho06 is calculated.

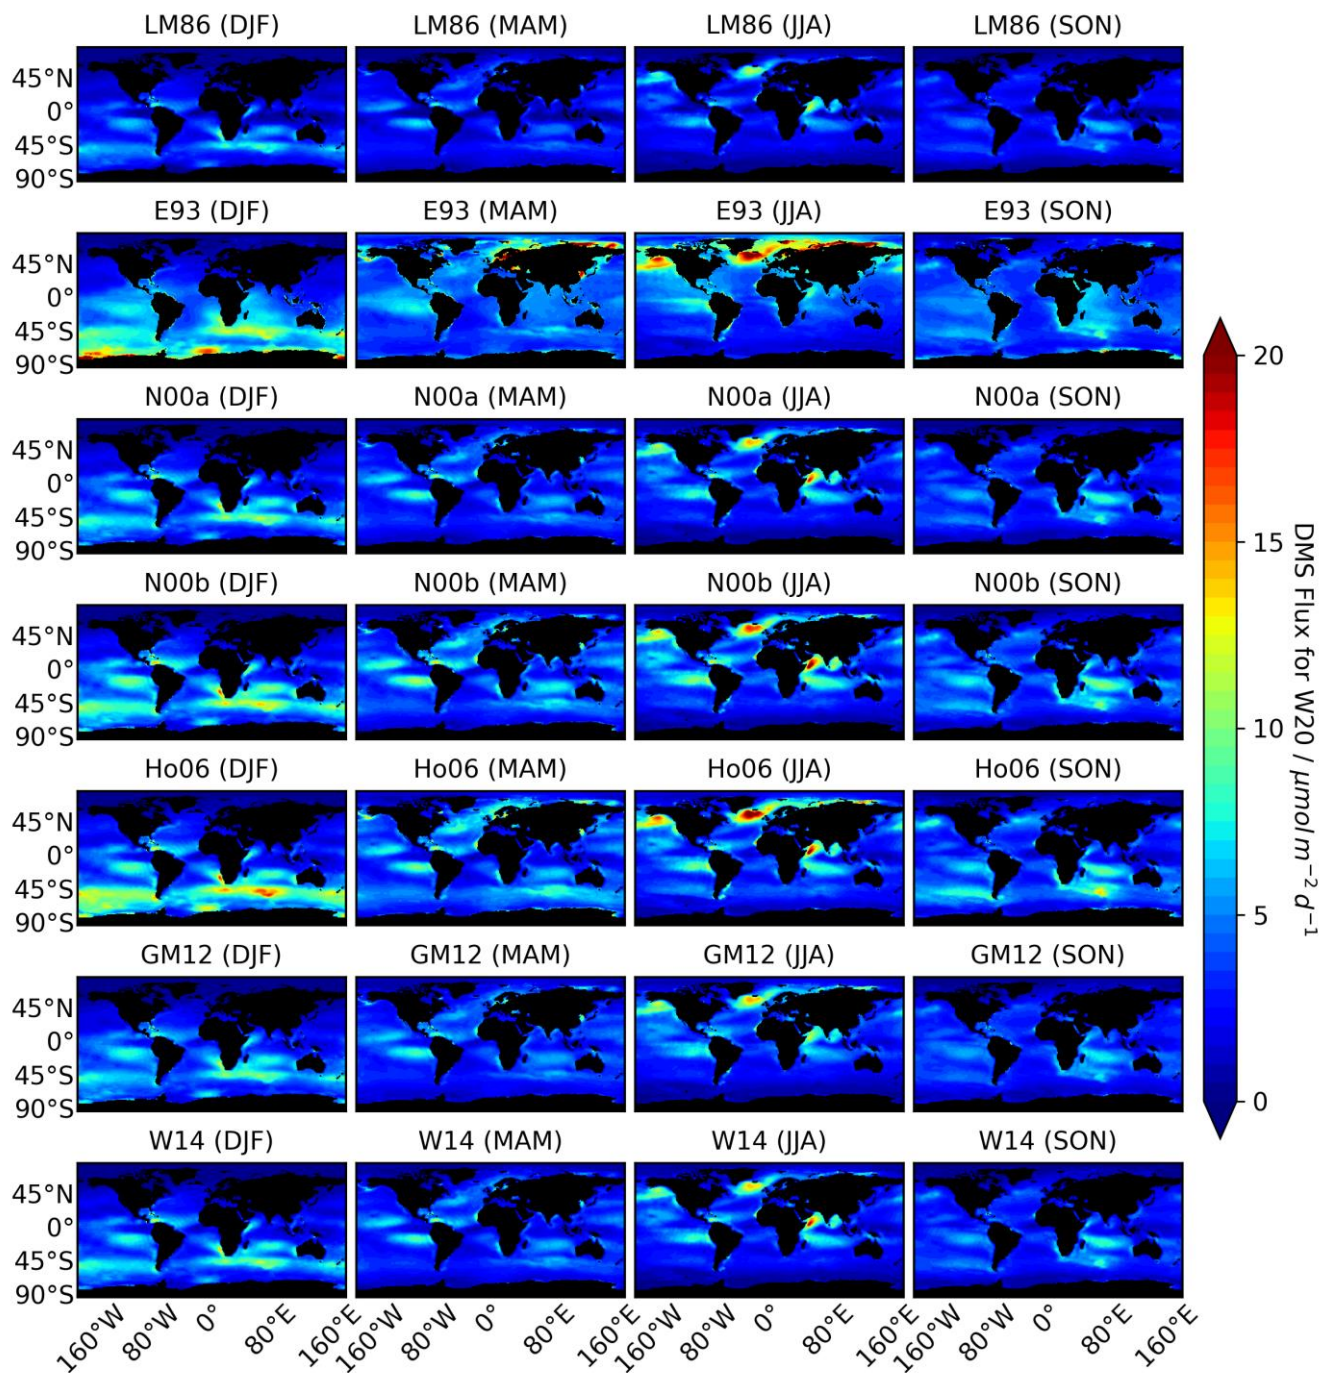

30 **Figure S2:** DMS flux estimation using seven different parameterizations for different seasons using the W20 climatology. In December-January-February (DJF) E93 calculates the highest flux value of  $27.86 \mu\text{mol m}^{-2} \text{d}^{-1}$  near Antarctic coastal region. In June-July-August (JJA) season E93 calculated highest flux of  $44.94 \mu\text{mol m}^{-2} \text{d}^{-1}$  in Kara Sea.



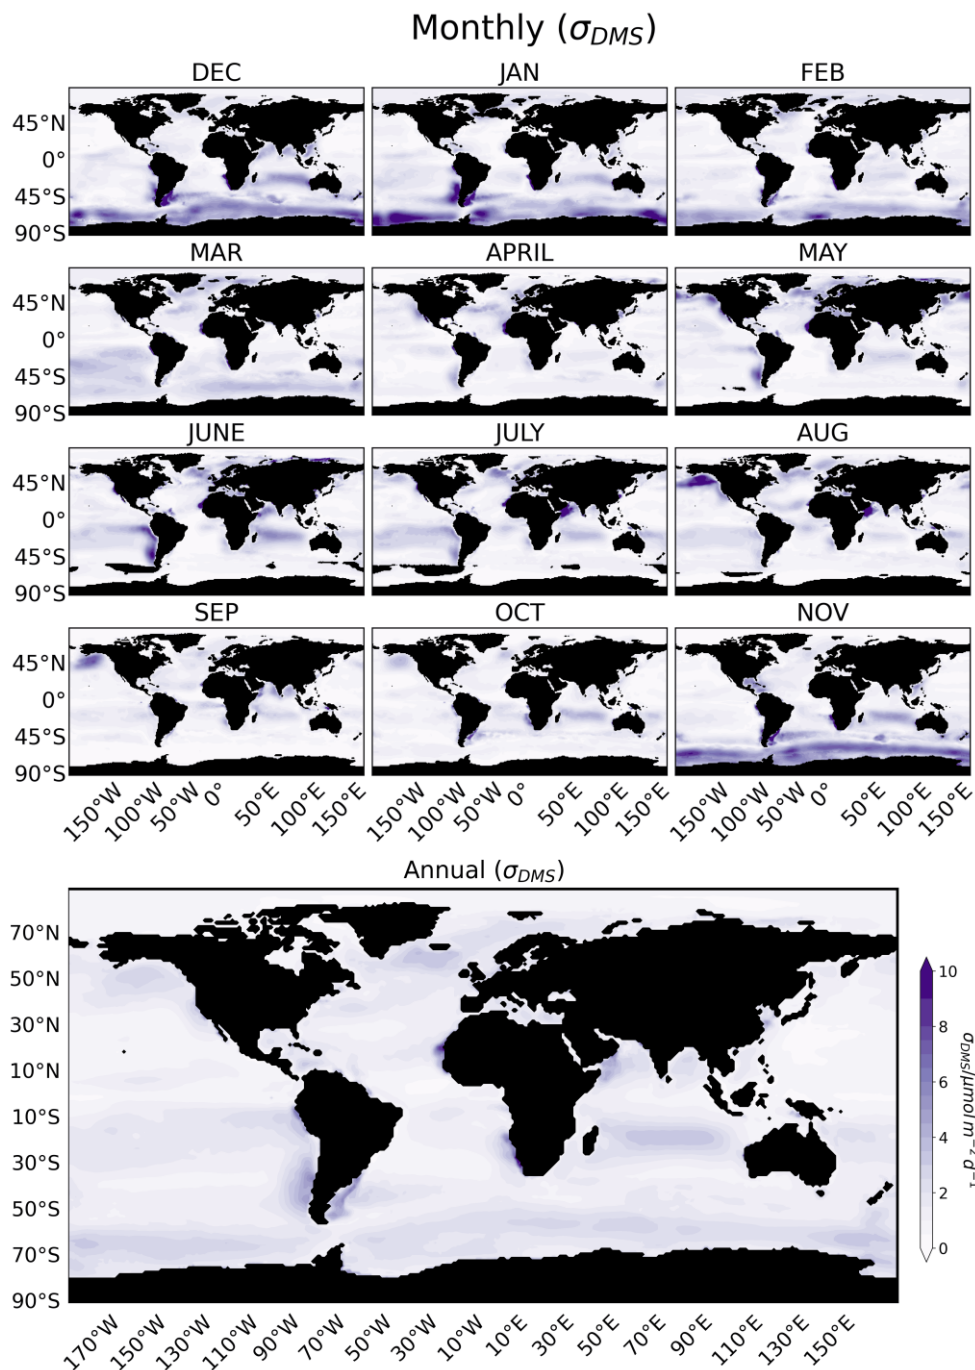

35 **Figure S3:** Standard deviation in DMS flux due to the standard deviation in seawater DMS concentration. In December-January-February (DJF), a maximum deviation of  $34.64 \mu\text{mol m}^{-2} \text{d}^{-1}$  in the South Atlantic Ocean in January is calculated. In the March-April-May (MAM) season, the maximum deviation of  $20.55 \mu\text{mol m}^{-2} \text{d}^{-1}$  in the Arabian Sea is calculated in May. In the June-July-August (JJA) season, it is  $23.87 \mu\text{mol m}^{-2} \text{d}^{-1}$  in the Arabian Sea in July. In the September-October-November (SON) season, the maximum deviation of  $18.40 \mu\text{mol m}^{-2} \text{d}^{-1}$  in the South Atlantic Ocean during November is calculated. On an annual scale, the maximum deviation calculated is  $11.42 \mu\text{mol m}^{-2} \text{d}^{-1}$  in the South Atlantic Ocean. The complete summary of maximum values is listed in Table S3.

40

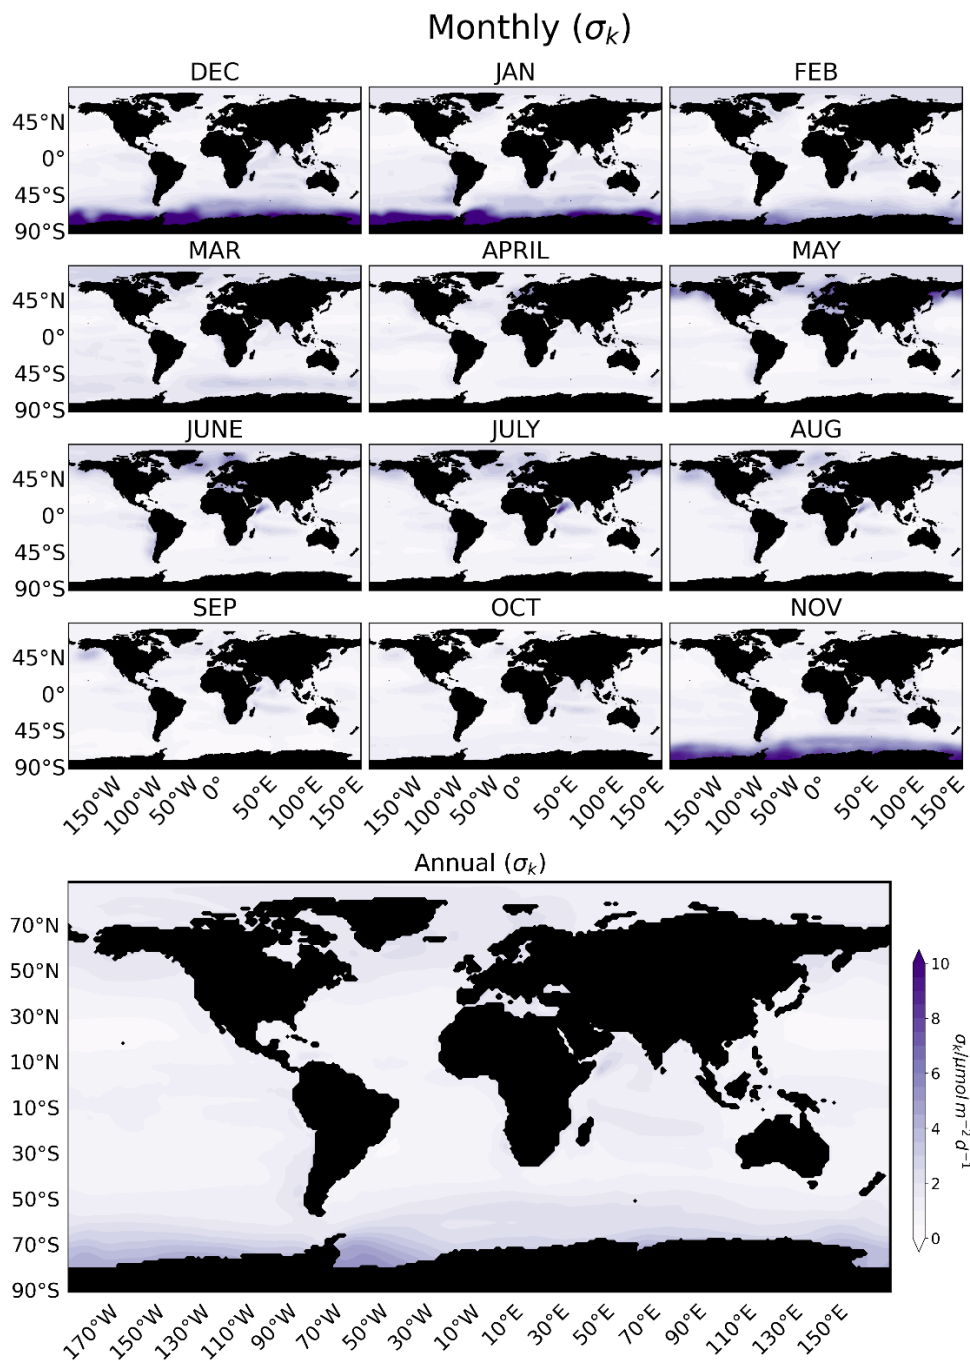

45

**Figure S4:** Standard deviation in DMS flux due to the standard deviation between different flux parameterizations. In December-January-February (DJF), a maximum deviation of  $21.70 \mu\text{mol m}^{-2} \text{d}^{-1}$  in the Weddell Sea is calculated in January. In the March-April-May (MAM) season, the maximum deviation of  $9.12 \mu\text{mol m}^{-2} \text{d}^{-1}$  is calculated in the Sea of Okhotsk during May. In the June-July-August (JJA) season, the maximum is  $8.86 \mu\text{mol m}^{-2} \text{d}^{-1}$  in the Indian Ocean is calculated in July. In the September-October-November (SON) season, the maximum deviation of  $10.43 \mu\text{mol m}^{-2} \text{d}^{-1}$  is calculated in the Weddell Sea. On an annual scale, the maximum deviation calculated is  $5.35 \mu\text{mol m}^{-2} \text{d}^{-1}$  in the Weddell Sea. The complete summary of maximum values is listed in Table S3.

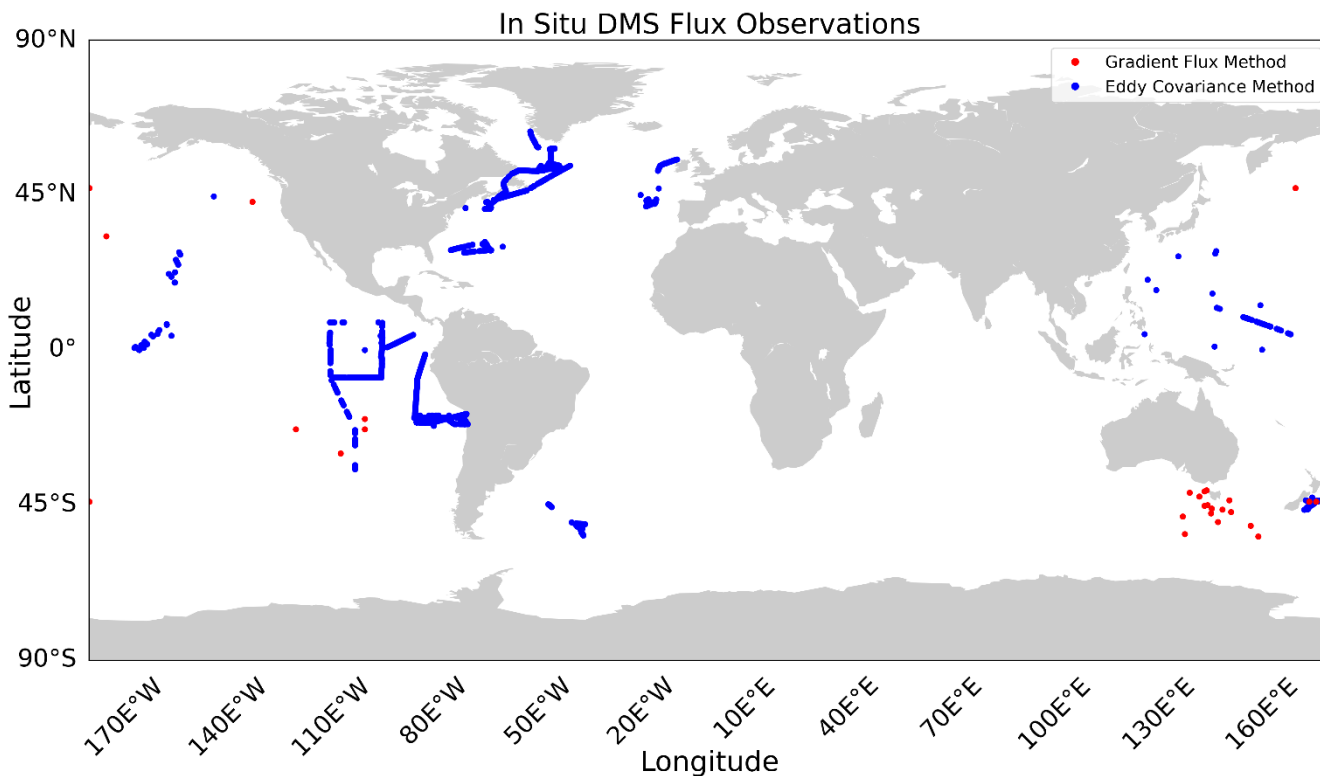

**Figure S5:** Global locations of in situ DMS flux observations. The fluxes are calculated either by Eddy Covariance or Gradient Flux Method.

50

55

### Regression Analysis with G18

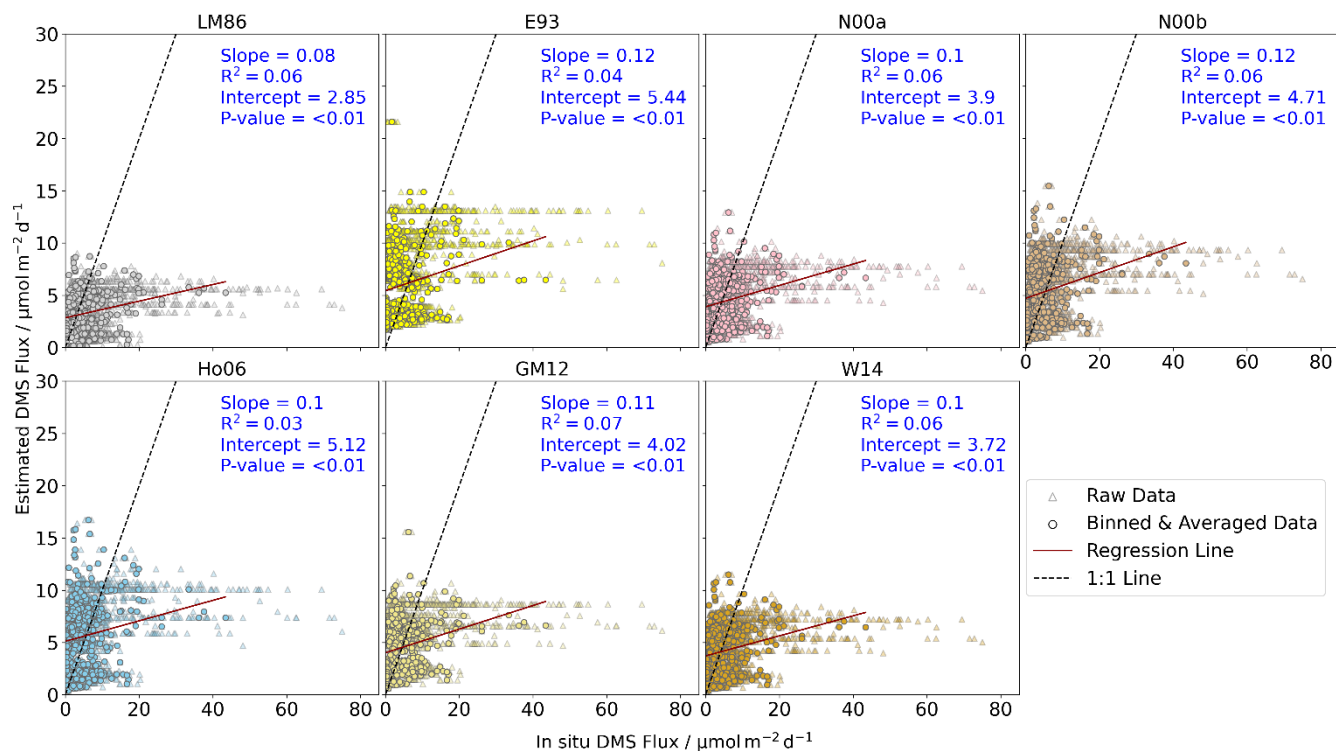

**Figure S6:** The regression between the in situ and estimated DMS fluxes using G18 with the N00b parameterization and the other six parameterizations show that regression with in situ data seems to be poor with R<sup>2</sup> values ranging from 0.03 to 0.07. Dark red line is the regression between binned and averaged in situ DMS flux and estimated DMS flux points. Black dash-line is the 1:1 representation between in situ flux points and estimated flux points.

60

65

## Regression Analysis with W20

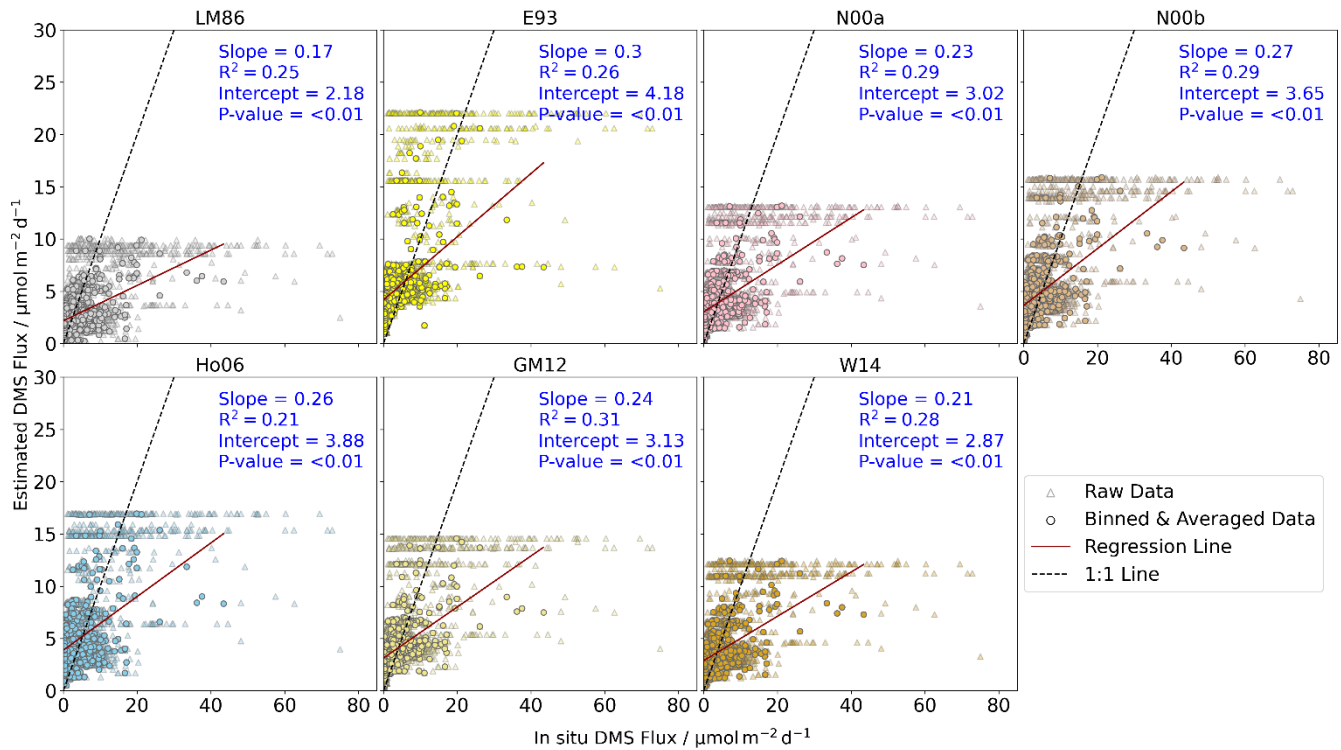

70 **Figure S7:** The regression between the in situ and estimated DMS fluxes using W20 with the N00b parameterization and the other six parameterizations show that regression with in situ data seems to be poor with  $R^2$  values ranging from 0.21 to 0.31. Dark red line is the regression between binned and averaged in situ DMS flux and estimated DMS flux points. Black dash-line is the 1:1 representation between in situ flux points and estimated flux points.

DMS flux (using G18 seawater DMS concentrations) trend

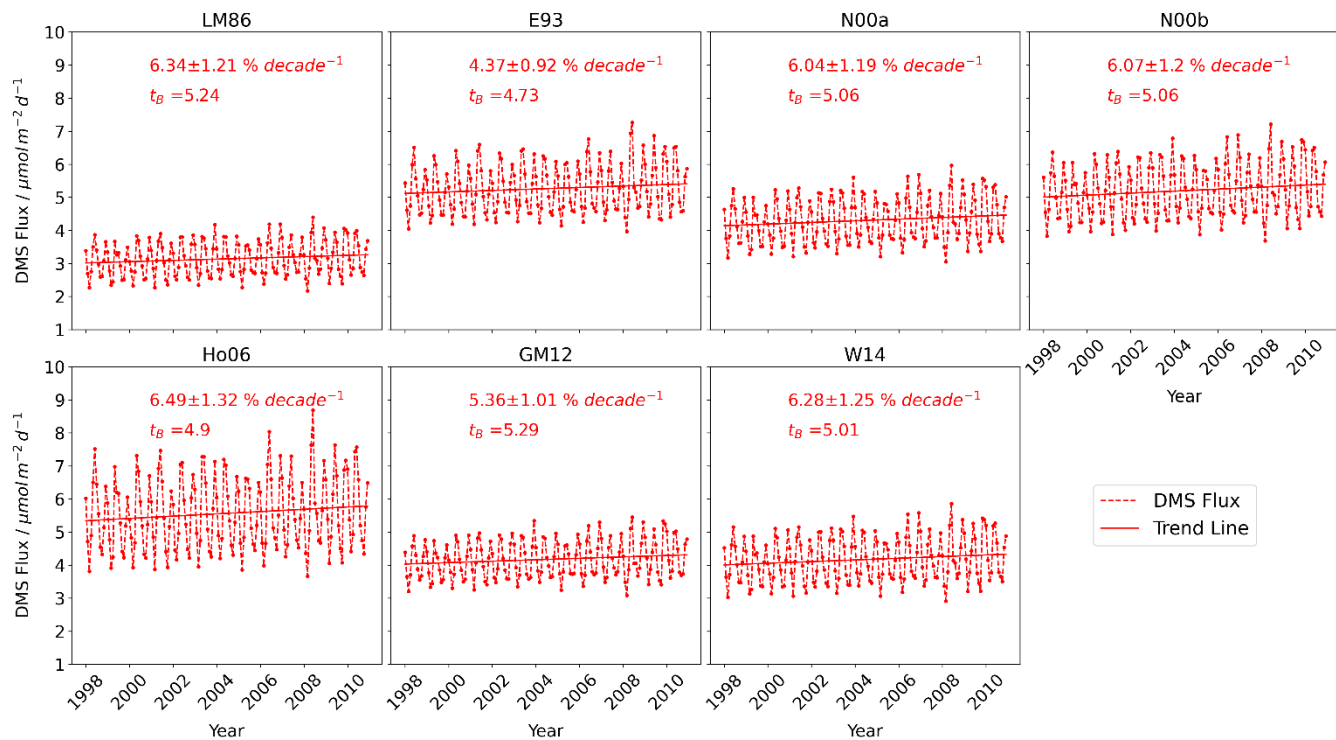

75

**Figure S8** : DMS flux trend using seawater DMS concentrations of G18 for each parameterization method. Trend is calculated using bootstrap resampling method. The trend is significant if t<sub>B</sub> > 2.

80

DMS flux (using W20 seawater DMS concentrations) trend

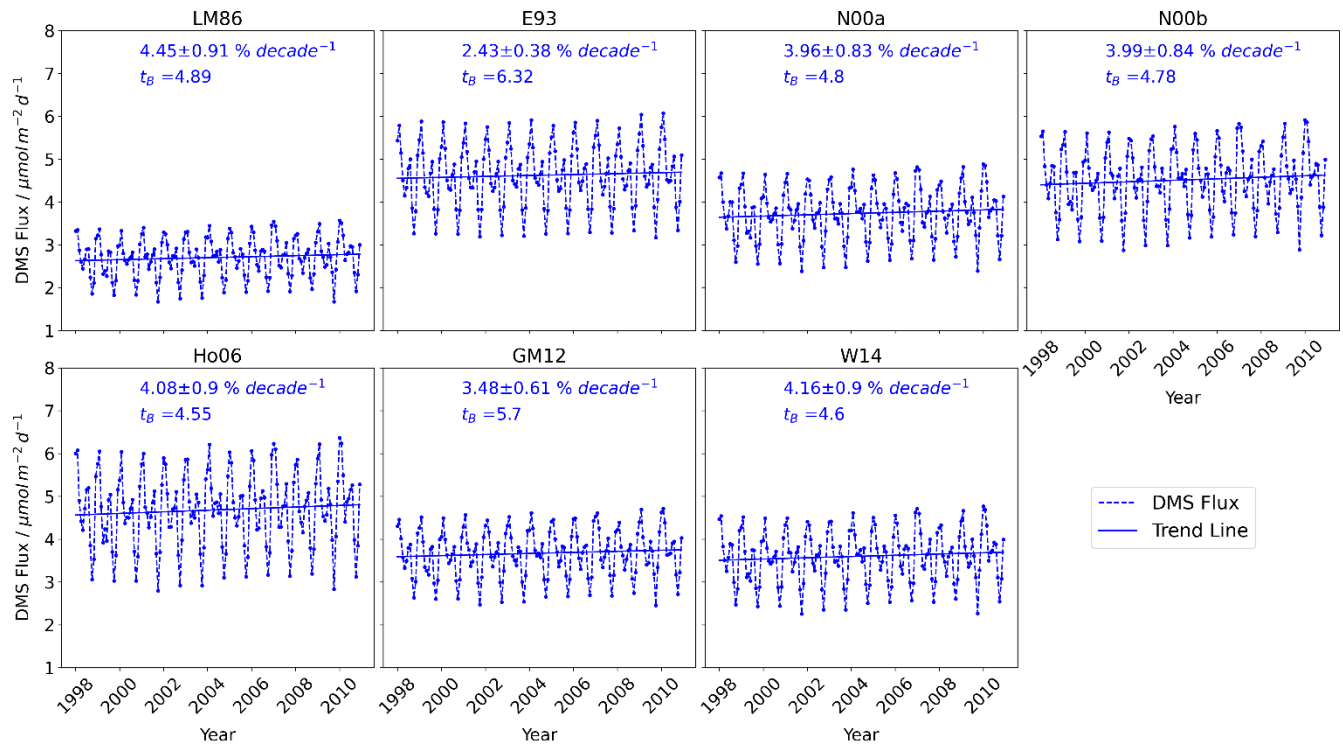

**Figure S9** : DMS flux trend using seawater DMS concentrations of W20 for each parameterization method. Trend is calculated using bootstrap resampling method. The trend is significant if  $t_B > 2$ .

85

90

95

## References

- Bell, T. G., De Bruyn, W., Marandino, C. A., Miller, S. D., Law, C. S., Smith, M. J., and Saltzman, E. S.: Dimethylsulfide gas transfer coefficients from algal blooms in the Southern Ocean, *Atmos. Chem. Phys.*, 15, 1783–1794, <https://doi.org/10.5194/acp-15-1783-2015>, 2015.
- 100 Blomquist, B. W., Brumer, S. E., Fairall, C. W., Huebert, B. J., Zappa, C. J., Brooks, I. M., Yang, M., Bariteau, L., Prytherch, J., Hare, J. E., Czerski, H., Matei, A., and Pascal, R. W.: Wind Speed and Sea State Dependencies of Air-Sea Gas Transfer: Results From the High Wind Speed Gas Exchange Study (HiWinGS), *J. Geophys. Res. Ocean.*, 122, 8034–8062, <https://doi.org/10.1002/2017JC013181>, 2017.
- Land, P. E., Shutler, J. D., Bell, T. G., and Yang, M.: Exploiting satellite earth observation to quantify current global oceanic DMS flux and its future climate sensitivity, *J. Geophys. Res. Ocean.*, 119, 7725–7740, <https://doi.org/10.1002/2014JC010104>, 2014.
- 105 Leck, C. and Persson, C.: The central Arctic Ocean as a source of dimethyl sulfide Seasonal variability in relation to biological activity, *Tellus B Chem. Phys. Meteorol.*, 48, 156, <https://doi.org/10.3402/tellusb.v48i2.15834>, 1996.
- Marandino, C. A., De Bruyn, W. J., Miller, S. D., and Saltzman, E. S.: Eddy correlation measurement of the air/sea flux of dimethylsulfide over the North Pacific Ocean, *J. Geophys. Res. Atmos.*, 112, 1–12, <https://doi.org/10.1029/2006JD007293>, 2007.
- 110 Marandino, C. A., De Bruyn, W. J., Miller, S. D., and Saltzman, E. S.: DMS air/sea flux and gas transfer coefficients from the North Atlantic summertime coccolithophore bloom, *Geophys. Res. Lett.*, 35, 1–5, <https://doi.org/10.1029/2008GL036370>, 2008.
- 115 Marandino, C. A., De Bruyn, W. J., Miller, S. D., and Saltzman, E. S.: Open ocean DMS air/sea fluxes over the eastern South Pacific Ocean, *Atmos. Chem. Phys.*, 9, 345–356, <https://doi.org/10.5194/acp-9-345-2009>, 2009.
- Omori, Y., Tanimoto, H., Inomata, S., Ikeda, K., Iwata, T., Kameyama, S., Uematsu, M., Gamo, T., Ogawa, H., and Furuya, K.: Sea-to-air flux of dimethyl sulfide in the South and North Pacific Ocean as measured by proton transfer reaction-mass spectrometry coupled with the gradient flux technique, *J. Geophys. Res.*, 122, 7216–7231, <https://doi.org/10.1002/2017JD026527>, 2017.
- 120 Sharma, S., Barrie, L. A., Plummer, D., McConnell, J. C., Brickell, P. C., Levasseur, M., Gosselin, M., and Bates, T. S.: Flux estimation of oceanic dimethyl sulfide around North America, *J. Geophys. Res. Atmos.*, 104, 21327–21342, <https://doi.org/10.1029/1999JD900207>, 1999.
- Shon, Z. H., Davis, D., Chen, G., Grodzinsky, G., Bandy, A., Thornton, D., Sandholm, S., Bradshaw, J., Stickel, R., Chameides, W., Kok, G., Russell, L., Mauldin, L., Tanner, D., and Eisele, F.: Evaluation of the DMS flux and its conversion to SO<sub>2</sub> over the southern ocean, *Atmos. Environ.*, 35, 159–172, [https://doi.org/10.1016/S1352-2310\(00\)00166-7](https://doi.org/10.1016/S1352-2310(00)00166-7), 2001.
- 125 Smith, M. J., Walker, C. F., Bell, T. G., Harvey, M. J., Saltzman, E. S., and Law, C. S.: Gradient flux measurements of sea-Air DMS transfer during the Surface Ocean Aerosol Production (SOAP) experiment, *Atmos. Chem. Phys.*, 18, 5861–5877, <https://doi.org/10.5194/acp-18-5861-2018>, 2018.



130 Yang, M., Blomquist, B. W., Fairall, C. W., Archer, S. D., and Huebert, B. J.: Air-sea exchange of dimethylsulfide in the Southern Ocean: Measurements from so GasEx compared to temperate and tropical regions, *J. Geophys. Res. Ocean.*, 116, 1–17, <https://doi.org/10.1029/2010JC006526>, 2011.
